# Supplementary material
Source: publisher figshare collection journal article supplement (https://gsajournals.figshare.com/ndownloader/files/14994902)
Supplement: Supplementary file 1 [file 14994902]

|  | Control T0 | Control T15 | Control T30 | Control T60 | Laser T0 | Laser T15 | Laser T30 | Laser T60 |
| --- | --- | --- | --- | --- | --- | --- | --- | --- |
| Control T0 |  | 0.815 | 1 | 0.963 | -0.037 | 0.556 | 0.481 | 0.778 |
| Control T15 | 0.815 |  | 0.333 | 0.333 | 1 | 0.963 | 0.148 | 0.074 |
| Control T30 | 1 | 0.333 |  | 0.185 | 1 | 1 | 0.704 | 0.148 |
| Control T60 | 0.963 | 0.333 | 0.185 |  | 1 | 1 | 0.63 | 0.037 |
| Laser  T0 | -0.037 | 1 | 1 | 1 |  | 0.778 | 0.714 | 0.963 |
| Laser  T15 | 0.556 | 0.963 | 1 | 1 | 0.778 |  | 0.148 | 0.815 |
| Laser  T30 | 0.481 | 0.148 | 0.704 | 0.63 | 0.714 | 0.148 |  | 0.148 |
| Laser  T60 | 0.778 | 0.074 | 0.148 | 0.037 | 0.963 | 0.815 | 0.148 |  |

**Table S2**. 1-Way Analysis of Similarities (ANOSIM) for treatment and time was performed on the resemblance data to measure variation between the samples and similarity between the replicates within different samples. The R statistic reported for each pair of treatment groups signifies no difference when the value is 0. When R approaches or is equal to 1, the difference between treatments being compared is significantly greater than the difference among the replicates within the treatments.
